# Supplementary material for: Advanced Anterior Eye Segment Imaging for Ichthyosis
Source: MDPI journal article supplement (doi:10.3390/jcm12186006), 2023-09-16
Supplement: s1 [file s1]

Table S1. Analyzed parameters of the anterior segment of the eye.

| Parameter                                                          | Development of an English Abbreviation                    | Description of the Parameter                                                                                                                                                                                                  | Unit                |
|--------------------------------------------------------------------|-----------------------------------------------------------|-------------------------------------------------------------------------------------------------------------------------------------------------------------------------------------------------------------------------------|---------------------|
| <b>Corneal Parameters [k, keratometric; r, real; p, posterior]</b> |                                                           |                                                                                                                                                                                                                               |                     |
| <b>Ks</b>                                                          | Keratometry steep                                         | Steep meridian value of keratometry of the curvature of the cornea                                                                                                                                                            | [D]—Diopter         |
| <b>Kf</b>                                                          | Keratometry flat                                          | Flat meridian value of keratometry of the curvature of the cornea                                                                                                                                                             | [D]—Diopter         |
| <b>CYL</b>                                                         | Cylinder                                                  | Astigmatism power                                                                                                                                                                                                             | [D]—Diopter         |
| <b>AvgK</b>                                                        | Average Keratometry                                       | Mean value of steep meridian Ks and flat meridian Kf                                                                                                                                                                          | [D]—Diopter         |
| <b>Ecc</b>                                                         | Eccentricity corneal curve                                | Ecc corresponds to the numeric value of the eccentricity at a 9 mm diameter area. Eccentricity describes the rate of corneal flattening from the central cornea to the periphery                                              | Numerical range 0-1 |
| <b>AA [%]</b>                                                      | Area Analyzed                                             | AA reflects the percentage of performed automatic analysis at a 10 mm diameter area [assuming the whole circumference as 100%]                                                                                                | [%] percentage      |
| <b>ACCP</b>                                                        | Average Central Corneal Power                             | The mean value of axial power within a 3 mm diameter                                                                                                                                                                          | [D]—Diopter         |
| <b>CAT</b>                                                         | Central Apical Thickness                                  | The corneal thickness on the measurement axis                                                                                                                                                                                 | [μm]—micrometers    |
| <b>CTT</b>                                                         | Corneal Thinnest Thickness                                | Corneal thinnest thickness                                                                                                                                                                                                    | [μm]—micrometers    |
| <b>CAT-CTT</b>                                                     | Central Apical Thickness minus Corneal Thinnest Thickness | The difference between central apical thickness and corneal thinnest thickness                                                                                                                                                | [μm]—micrometers    |
| <b>ACD [mm]</b>                                                    | Anterior Chamber Depth                                    | Anterior chamber depth from the posterior corneal surface to the anterior crystalline lens surface                                                                                                                            | [mm] millimeters    |
| <b>ESI [%]</b>                                                     | Ectasia Screening Index                                   | ESI (%) is assessed based on the following data: the thinnest corneal thickness (μm) and its location related to the corneal apex (mm) (X, Y coordinates); FI of the keratometric and posterior topography data; the location | [%] percentage      |

|                                                                                           |                               |                                                                                                                                                                                                                         |                 |
|-------------------------------------------------------------------------------------------|-------------------------------|-------------------------------------------------------------------------------------------------------------------------------------------------------------------------------------------------------------------------|-----------------|
|                                                                                           |                               | and the lowest value of the instantaneous posterior power within a 6 mm diameter.                                                                                                                                       |                 |
| <b>Fourier indices; area of 3 mm and 6 mm; k, keratometric; a, anterior; p, posterior</b> |                               |                                                                                                                                                                                                                         |                 |
| <b>Spherical</b>                                                                          | Fourier Index<br>Spherical    | The spherical refractive power component of the cornea obtained by Fourier analysis of the topographic data of the cornea with a diameter of 3 and 6 mm. Corresponds to the zero-order component in Fourier analysis    | [D]—<br>Diopter |
| <b>Reg. Astigmatism</b>                                                                   | Fourier Index<br>Regular      | The component of regular corneal refractive power astigmatism obtained by Fourier analysis of corneal topographic data with a diameter of 3 and 6 mm. Corresponds to the second-order component in the Fourier analysis | [D]—<br>Diopter |
| <b>Asymmetry</b>                                                                          | Fourier Index<br>Asymmetry    | Asymmetric refractive power component of the cornea obtained by Fourier analysis of corneal topographic data with a diameter of 3 and 6 mm. Corresponds to the first-order component in Fourier analysis                | [D]—<br>Diopter |
| <b>Higher Order</b>                                                                       | Fourier Index<br>Higher Order | Higher order irregularities—calculated by combining tertiary and higher components in Fourier analysis                                                                                                                  | [D]—<br>Diopter |

Table S2. BCVA, ocular surface examination, and corneal topography and thickness map results.

| Parameter                              | P1                 | P2                  | P3                 | P4                 | P5                 | min   | max  | median |
|----------------------------------------|--------------------|---------------------|--------------------|--------------------|--------------------|-------|------|--------|
| BCVA                                   | RE 0,8<br>LE 0,7   | RE 0,2<br>LE LP     | RE 0,05<br>LE 0,1  | RE 0,3<br>LE 0,2   | RE 1,0<br>LE 0,4   | LP    | 1,0  | 0,25   |
| TBUT [s]                               | RE 6<br>LE 8       | RE 4<br>LE 4        | RE 7<br>LE 8       | RE 5<br>LE 5       | RE 12<br>LE 8      | 4     | 10   | 6,5    |
| Fluorescein staining<br>[Oxford scale] | RE IV<br>LE II     | RE III<br>LE IV     | RE IV<br>LE III    | RE II<br>LE II     | RE 0<br>LE I       | 0     | IV   |        |
| kKs [D]                                | RE 43,1<br>LE 42,0 | RE 48,1<br>LE 68,6  | RE 57,3<br>LE 53,4 | RE 50,4<br>LE 47,5 | RE 45,1<br>LE 44,7 | 42    | 68,6 | 47,8   |
| kKf [D]                                | RE 41,2<br>LE 41,5 | RE 45,8<br>LE 62,8  | RE 53,6<br>LE 46,3 | RE 47,4<br>LE 46,4 | RE 42,7<br>LE 42,2 | 41,2  | 62,8 | 46,05  |
| kCYL [D]                               | RE 1,9<br>LE 0,5   | RE 2,3<br>LE 6,2    | RE 3,8<br>LE 7,1   | RE 2,9<br>LE 1,2   | RE 2,4<br>LE 2,5   | 0,5   | 7,1  | 2,45   |
| kAvgK [D]                              | RE 42,1<br>LE 41,8 | RE 47,0<br>LE 66,2  | RE 55,4<br>LE 49,8 | RE 48,9<br>LE 47,0 | RE 43,9<br>LE 43,5 | 41,8  | 66,2 | 47     |
| kEcc                                   | RE 0,21<br>LE 0,32 | RE 0,31<br>LE 0,32  | RE 0,54<br>LE 0,55 | RE 0,73<br>LE 0,61 | RE 0,53<br>LE 0,59 | 0,21  | 0,73 | 0,53   |
| kAA [%]                                | RE 97,2<br>LE 98,9 | RE 94,0<br>LE 89    | RE 100<br>LE 99,9  | RE 97<br>LE 90     | RE 93,3<br>LE 97,5 | 89    | 100  | 97,1   |
| kACCP [D]                              | RE 42,1<br>LE 41,8 | RE 47,4<br>LE 65,5  | RE 55,7<br>LE 49,4 | RE 49,4<br>LE 47,0 | RE 43,9<br>LE 43,8 | 41,8  | 65,5 | 47,2   |
| pKs [D]                                | RE -6,2<br>LE -6,3 | RE -6,5<br>LE -11,1 | RE -8,0<br>LE -6,8 | RE -7,7<br>LE -6,9 | RE -6,8<br>LE -6,7 | -11,1 | -6,2 | -6,8   |
| pKf [D]                                | RE -5,9<br>LE -6,0 | RE -6,5<br>LE -9,3  | RE -7,3<br>LE -6,3 | RE -7,1<br>LE -6,5 | RE -6,1<br>LE -6,0 | -9,3  | -5,9 | -6,4   |
| pCYL [D]                               | RE 0,3<br>LE 0,3   | RE 0,1<br>LE 1,8    | RE 0,7<br>LE 0,6   | RE 0,6<br>LE 0,4   | RE 0,7<br>LE 0,7   | 0,1   | 1,8  | 0,6    |
| pAvgK [D]                              | RE -6,0<br>LE -6,2 | RE -6,5<br>LE -10,1 | RE -7,6<br>LE -6,5 | RE -7,4<br>LE -6,7 | RE -6,4<br>LE -6,3 | -10,1 | -6   | -6,5   |

|           |                    |                    |                    |                    |                    |      |      |       |
|-----------|--------------------|--------------------|--------------------|--------------------|--------------------|------|------|-------|
| pEcc      | RE 0,48<br>LE 0,65 | RE 0,31<br>LE 0,83 | RE 0,59<br>LE 0,57 | RE 0,83<br>LE 0,65 | RE 0,7<br>LE 0,6   | 0,31 | 0,83 | 0,63  |
| pAA [%]   | RE 94<br>LE 94,6   | RE 91,4<br>LE 66,7 | RE 100<br>LE 98,5  | RE 94,5<br>LE 88,1 | RE 90,7<br>LE 95,2 | 66,7 | 100  | 94,25 |
| rKs [D]   | RE 42,1<br>LE 40,9 | RE 47,3<br>LE 65,4 | RE 58,0<br>LE 52,9 | RE 48,6<br>LE 46,2 | RE 43,6<br>LE 43,3 | 40,9 | 65,4 | 46,75 |
| rKf [D]   | RE 40,0<br>LE 40,1 | RE 44,9<br>LE 63,8 | RE 52,6<br>LE 45,6 | RE 46,0<br>LE 45,2 | RE 41,6<br>LE 41,1 | 40   | 63,8 | 45,05 |
| rCYL [D]  | RE 2,0<br>LE 0,8   | RE 2,4<br>LE 1,9   | RE 5,4<br>LE 7,3   | RE 2,6<br>LE 1,0   | RE 2,1<br>LE 2,1   | 0,8  | 7,3  | 2,1   |
| rAvgK [D] | RE 41,0<br>LE 40,5 | RE 46,1<br>LE 64,4 | RE 55,3<br>LE 49,2 | RE 47,3<br>LE 45,7 | RE 42,6<br>LE 42,2 | 40,5 | 64,4 | 45,9  |
| rAA [%]   | RE 94<br>LE 94,6   | RE 91,4<br>LE 58,6 | RE 100<br>LE 98,5  | RE 94,5<br>LE 88,1 | RE 90,7<br>LE 95,2 | 58,6 | 100  | 94,25 |
| rACCP [D] | RE 41,0<br>LE 40,5 | RE 46,5<br>LE 62,1 | RE 55,1<br>LE 48,7 | RE 47,8<br>LE 45,8 | RE 42,6<br>LE 42,6 | 41   | 62,1 | 46,15 |
| CAT[μm]   | RE 539<br>LE 529   | RE 606<br>LE 734   | RE 573<br>LE 552   | RE 480<br>LE 505   | RE 545<br>LE 548   | 480  | 734  | 546,5 |
| CTT [μm]  | RE 520<br>LE 509   | RE 528<br>LE 395   | RE 356<br>LE 459   | RE 462<br>LE 498   | RE 540<br>LE 540   | 356  | 540  | 503,5 |
| CAT-CTT   | RE 10<br>LE 20     | RE 78<br>LE 375    | RE 217<br>LE 93    | RE 18<br>LE 7      | RE 5<br>LE 8       | 5    | 375  | 19    |
| ACD [mm]  | RE 2,97<br>LE 2,94 | RE 2,27<br>LE 1,9  | RE 2,86<br>LE 2,81 | RE 3,03<br>LE 2,95 | RE 3,02<br>LE 2,91 | 1,9  | 3,03 | 2,925 |
| ESI [%]   | RE 0<br>LE 0       | RE 95<br>LE 95     | RE 95<br>LE 50     | RE 61<br>LE 7      | RE 0<br>LE 0       | 0    | 95   | 28,5  |

BCVA, best corrected visual acuity; TBUT, tear break-up time; [k] keratometric; [p] posterior; [r] real; Ks, keratometry steep; Kf, keratometry flat; CYL, astigmatism, AvgK average keratometry; Ecc, eccentricity of the corneal curve; AA, area analyzed, ACCP, average central corneal power; CAT, corneal apex thickness; CTT, corneal thinnest thickness, ACD, anterior chamber depth, Esi, ectasia screening index.

Table S3. Fourier Indices results.

| Parameter                  | P1                   | P2                     | P3                     | P4                    | P5                   | min   | max   | median |
|----------------------------|----------------------|------------------------|------------------------|-----------------------|----------------------|-------|-------|--------|
| 3 mm k<br>Spherical        | RE 42,11<br>LE 41,79 | RE 47,67*<br>LE 68,43* | RE 55,64*<br>LE 49,38* | RE 49,64*<br>LE 46,93 | RE 43,84<br>LE 43,97 | 41,79 | 68,43 | 47,3   |
| 3 mm k Reg.<br>Astigmatism | RE 0,94<br>LE 0,21   | RE 1,47*<br>LE 5,67*   | RE 1,97*<br>LE 3,57*   | RE 1,51*<br>LE 0,69   | RE 1,19<br>LE 1,21   | 0,21  | 5,67  | 1,34   |
| 3 mm k<br>Asymmetry        | RE 0,41<br>LE 0,4    | RE 7,66*<br>LE 5,36*   | RE 4,06*<br>LE 0,83*   | RE 2,64*<br>LE 0,67   | RE 0,21<br>LE 0,14   | 0,14  | 7,66  | 0,75   |

|                         |                      |                        |                        |                       |                      |       |       |       |
|-------------------------|----------------------|------------------------|------------------------|-----------------------|----------------------|-------|-------|-------|
| 3 mm k Higher Order     | RE 0,28*<br>LE 0,34* | RE 2,36*<br>LE 5,94*   | RE 6,69*<br>LE 1,74*   | RE 0,12<br>LE 0,11    | RE 0,16<br>LE 0,8    | 0,11  | 6,69  | 0,34  |
| 6 mm k Spherical        | RE 42,1<br>LE 41,83  | RE 44,93<br>LE 64,18*  | RE 53,55*<br>LE 48,56* | RE 48,65*<br>LE 46,74 | RE 43,77<br>LE 43,6  | 41,83 | 64,18 | 45,84 |
| 6 mm k Reg. Astigmatism | RE 1,08*<br>LE 0,3   | RE 1,84*<br>LE 4,86*   | RE 2,14*<br>LE 3,32*   | RE 1,48*<br>LE 0,6    | RE 1,21*<br>LE 1,31* | 0,3   | 4,86  | 1,39  |
| 6 mm k Asymmetry        | RE 0,48<br>LE 0,5    | RE 10,39*<br>LE 5,81*  | RE 6,07*<br>LE 1,32*   | RE 3,19*<br>LE 0,9*   | RE 0,38<br>LE 0,31   | 0,31  | 10,39 | 1,11  |
| 6 mm k Higher Order     | RE 0,42*<br>LE 0,39* | RE 2,32*<br>LE 6,01*   | RE 0,81*<br>LE 1,72*   | RE 0,15<br>LE 0,12    | RE 0,16<br>LE 0,22   | 0,12  | 6,01  | 0,41  |
| 3 mm a Spherical        | RE 46,92<br>LE 46,56 | RE 53,11*<br>LE 74,32* | RE 61,98*<br>LE 55,01* | RE 54,2*<br>LE 52,28  | RE 48,84<br>LE 48,99 | 46,56 | 74,32 | 52,69 |
| 3 mm a Reg. Astigmatism | RE 1,05<br>LE 0,24   | RE 1,64*<br>LE 6,31*   | RE 2,2*<br>LE 3,97*    | RE 1,64*<br>LE 0,77   | RE 1,33<br>LE 1,34   | 0,24  | 6,31  | 1,49  |
| 3 mm an Asymmetry       | RE 0,46<br>LE 0,45   | RE 8,53*<br>LE 5,96*   | RE 4,52*<br>LE 0,93*   | RE 3,55*<br>LE 0,75*  | RE 0,23<br>LE 0,16   | 0,16  | 8,53  | 0,84  |
| 3 mm a Higher Order     | RE 0,31*<br>LE 0,38* | RE 2,63*<br>LE 6,61*   | RE 0,77*<br>LE 1,94*   | RE 0,17<br>LE 0,12    | RE 0,18<br>LE 0,20   | 0,12  | 6,61  | 0,34  |
| 6 mm a Spherical        | RE 46,9<br>LE 46,6   | RE 50,5<br>LE 71,5*    | RE 59,66*<br>LE 54,10* | RE 54,2*<br>LE 52,08  | RE 48,76<br>LE 48,57 | 46,6  | 71,5  | 51,29 |
| 6 mm a Reg. Astigmatism | RE 1,2*<br>LE 0,33   | RE 2,06*<br>LE 5,41*   | RE 2,38*<br>LE 3,69*   | RE 1,64*<br>LE 0,67   | RE 1,35*<br>LE 1,46* | 0,33  | 5,41  | 1,55  |
| 6 mm an Asymmetry       | RE 0,54<br>LE 0,56   | RE 11,57*<br>LE 7,59*  | RE 6,76*<br>LE 1,47*   | RE 3,55*<br>LE 1,01*  | RE 0,42<br>LE 0,35   | 0,35  | 11,57 | 1,24  |
| 6 mm a Higher Order     | RE 0,47*<br>LE 0,43* | RE 2,59*<br>LE 6,73*   | RE 0,91*<br>LE 1,92*   | RE 0,17<br>LE 0,13    | RE 0,18<br>LE 0,24   | 0,13  | -6,73 | 0,45  |
| 3 mm p Spherical        | RE -6,02<br>LE -6,15 | RE -6,54<br>LE -10,2*  | RE -7,02*<br>LE -6,43  | RE -7,38*<br>LE -6,72 | RE -6,4<br>LE -6,34  | -10,2 | -6,02 | -6,48 |
| 3 mm p Reg. Astigmatism | RE 0,14<br>LE 0,14   | RE 0,38*<br>LE 1,93*   | RE 0,88*<br>LE 0,23    | RE 0,34*<br>LE 0,19   | RE 0,35*<br>LE 0,33  | 0,14  | 1,93  | 0,34  |
| 3 mm p Asymmetry        | RE 0,12<br>LE 0,15*  | RE 1,25*<br>LE 0,41*   | RE 1,97*<br>LE 0,86*   | RE 1,09*<br>LE 0,14*  | RE 0,07<br>LE 0,03   | 0,03  | 1,97  | 0,15  |
| 3 mm p Higher Order     | RE 0,04*<br>LE 0,06* | RE 0,23*<br>LE 1,81*   | RE 0,93*<br>LE 0,16*   | RE 0,07*<br>LE 0,03   | RE 0,02<br>LE 0,03   | 0,02  | 1,81  | 0,06  |

|                                    |                             |                              |                              |                             |                                  |             |             |             |
|------------------------------------|-----------------------------|------------------------------|------------------------------|-----------------------------|----------------------------------|-------------|-------------|-------------|
| 6 mm p<br>Spherical                | RE -6,0<br>LE -6,1          | RE -6,43<br>LE -9,51*        | RE -6,89*<br>LE -6,42        | RE -7,14*<br>LE -6,69       | RE -6,36<br>LE -6,3              | -9,51       | -6,0        | -6,425      |
| <b>6 mm p Reg.<br/>Astigmatism</b> | <b>RE 0,13<br/>LE 0,12</b>  | <b>RE 0,3<br/>LE 1,74*</b>   | <b>RE 0,73*<br/>LE 0,29</b>  | <b>RE 0,34*<br/>LE 0,18</b> | <b>RE<br/>0,32*<br/>LE 0,31*</b> | <b>0,12</b> | <b>1,74</b> | <b>0,31</b> |
| 6 mm p<br>Asymmetry                | RE 0,12<br>LE 0,14          | RE 1,31*<br>LE 0,75*         | RE 2,03*<br>LE 0,93*         | RE 1,05*<br>LE 0,13         | RE 0,09<br>LE 0,04               | 0,04        | 2,03        | 0,445       |
| <b>6 mm p<br/>Higher Order</b>     | <b>RE 0,05<br/>LE 0,06*</b> | <b>RE 0,21*<br/>LE 1,81*</b> | <b>RE 0,84*<br/>LE 0,15*</b> | <b>RE 0,06*<br/>LE 0,03</b> | <b>RE 0,02<br/>LE 0,04</b>       | <b>0,02</b> | <b>1,81</b> | <b>0,06</b> |

\*out of reference range [normative database]; bold font – parameters, which showed abnormalities for at least four patients in at least one eye; RE right eye; LE left eye; [k], keratometric; [a] anterior; [p] posterior; Reg., regular.
